# Supplementary material
Source: ML conference proceedings conference paper supplement (https://proceedings.neurips.cc/paper_files/paper/2016/hash/88a839f2f6f1427879fc33ee4acf4f66-Abstract.html)
Supplement: Supplementary file 1 [file 88a839f2f6f1427879fc33ee4acf4f66-Supplemental.zip]

Archive with 1 entries (1 files):
- supplementary_material.pdf
